# Supplementary material
Source: publisher figshare collection journal article supplement (https://geolsoc.figshare.com/ndownloader/files/8731567)
Supplement: Supplementary file 1 [file 8731567]

# Supplementary figure b: Bamboo Creek growth Syncline

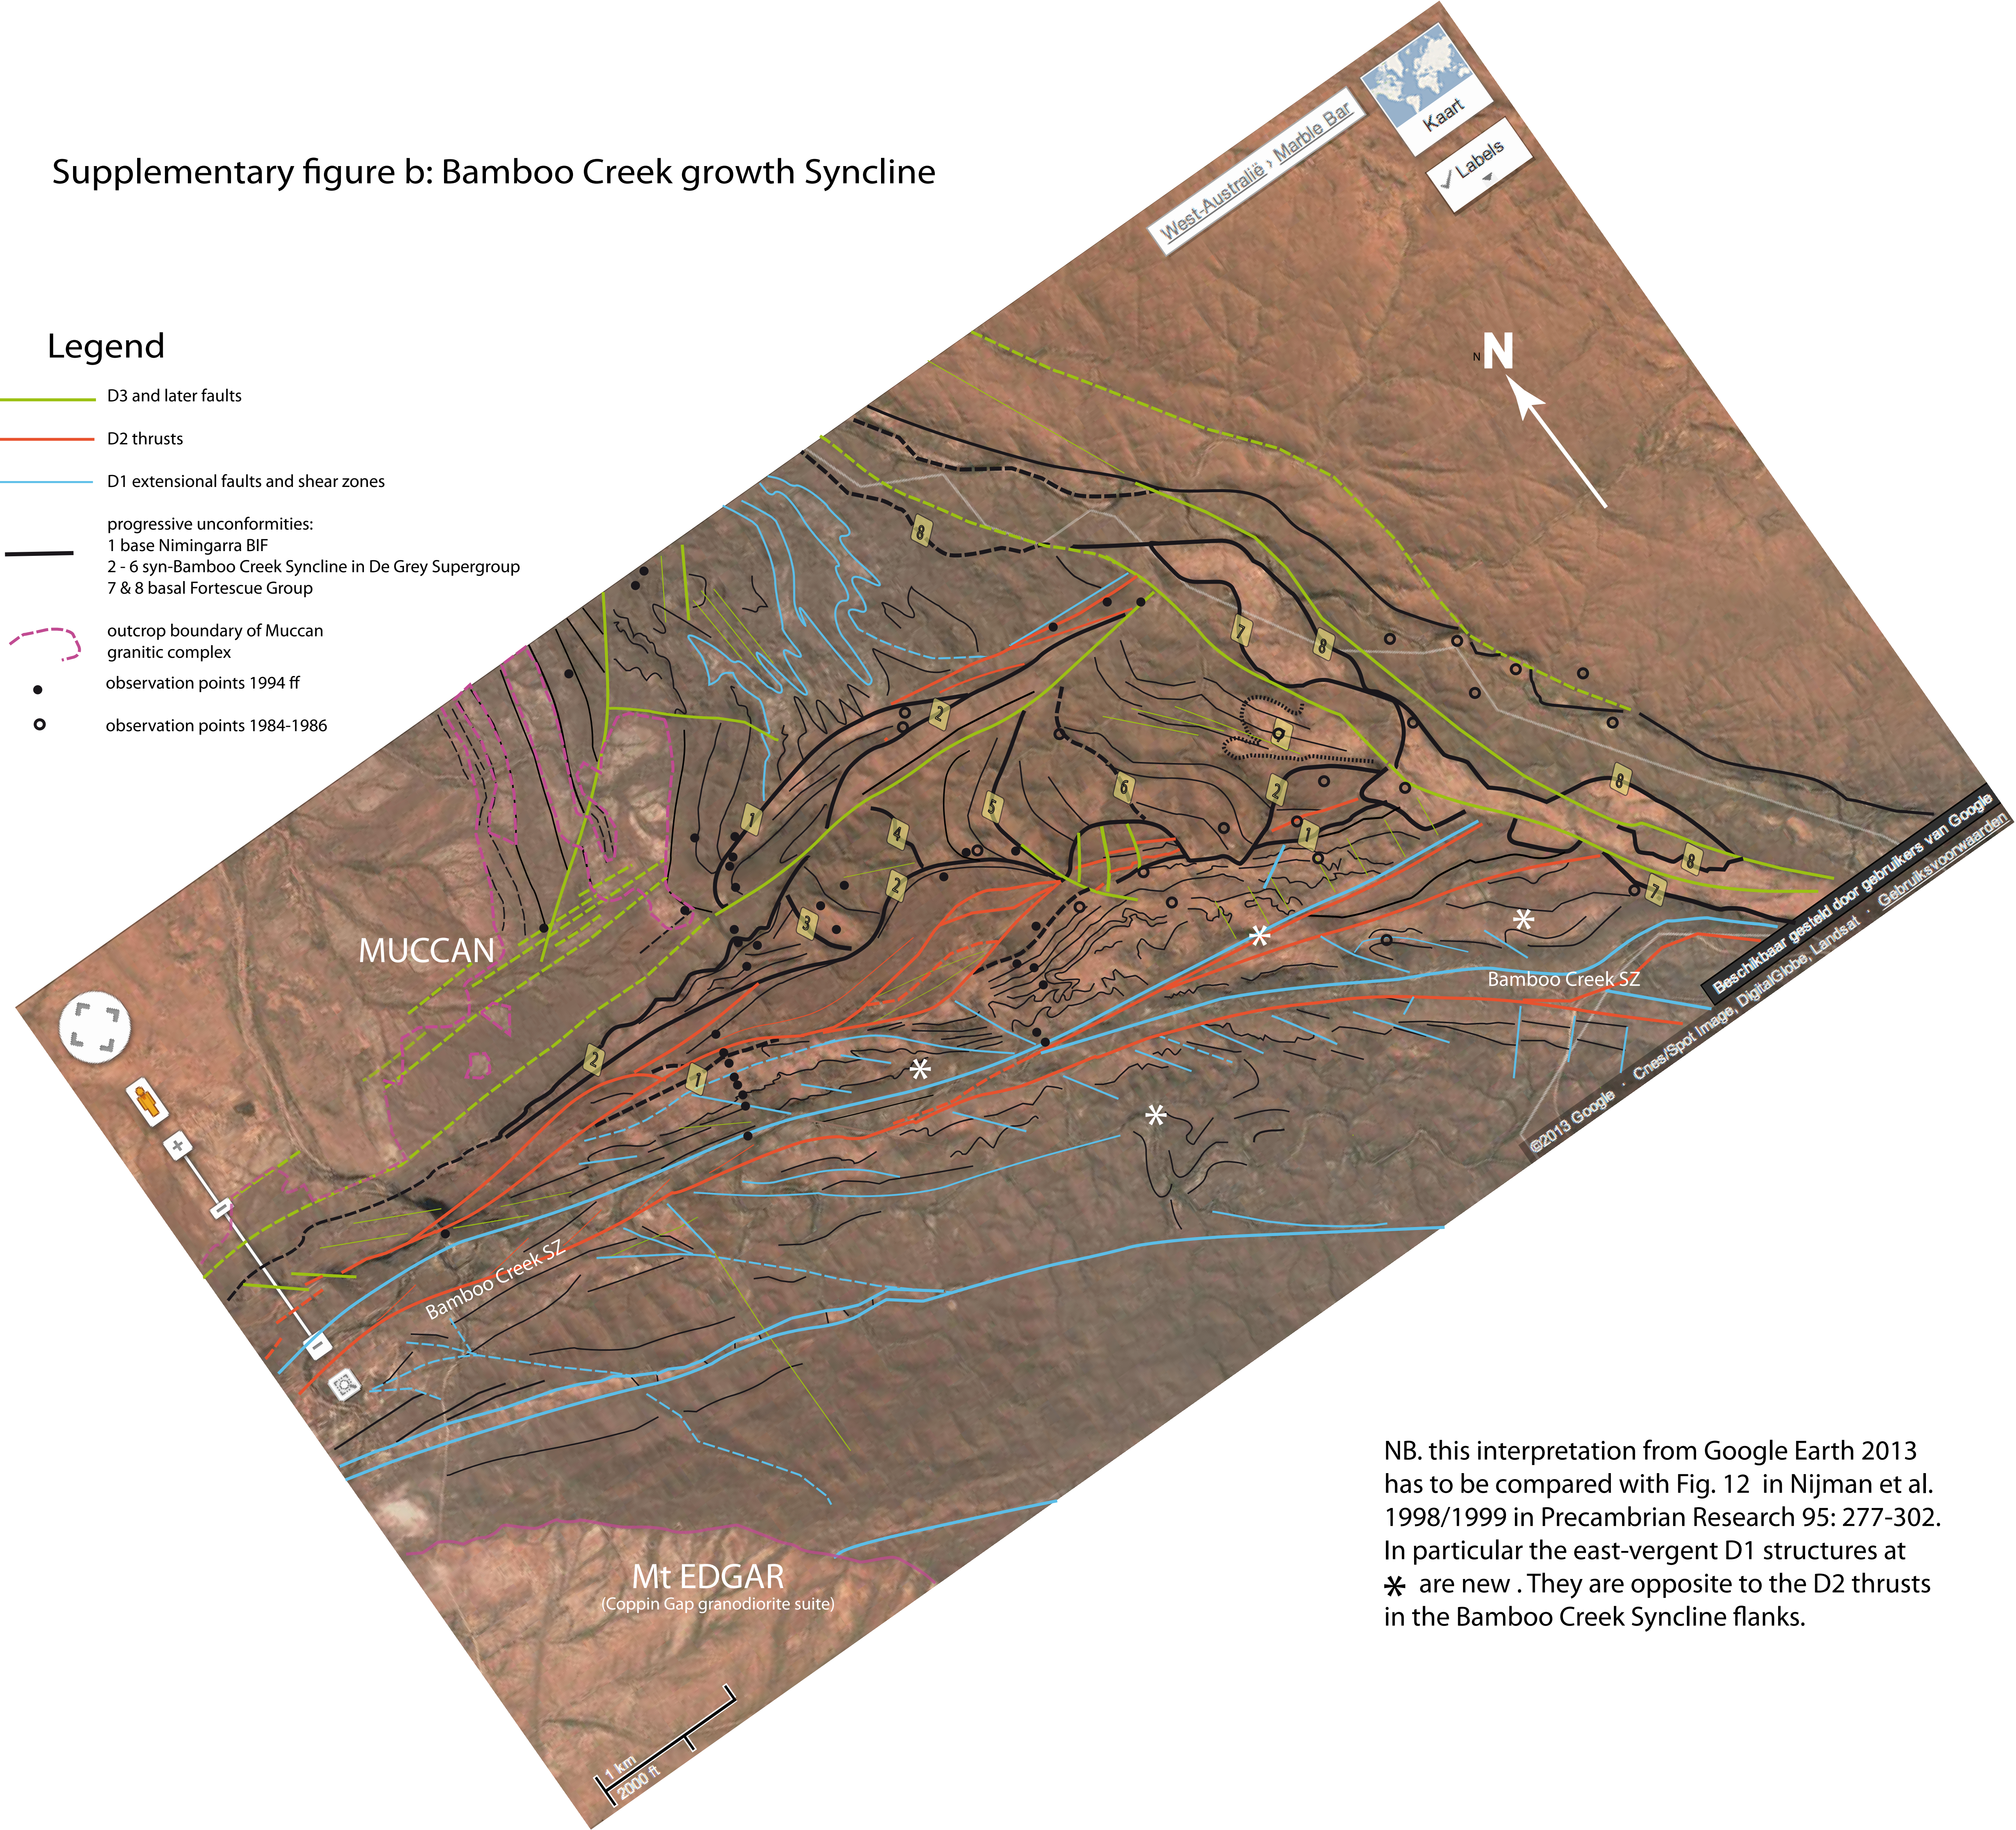

NB. this interpretation from Google Earth 2013 has to be compared with Fig. 12 in Nijman et al. 1998/1999 in Precambrian Research 95: 277-302. In particular the east-vergent D1 structures at \* are new . They are opposite to the D2 thrusts in the Bamboo Creek Syncline flanks.
